# Supplementary material
Source: Royal Society of Chemistry journal article supplement (doi:10.1039/d6tc00768f)
Supplement: d6tc00768f1.pdf [file d6tc00768f1.pdf]

## Supporting Information

# **Cu-based Metal–Organic Framework with High Specificity and Efficient Peroxidase-Like Catalytic Activity for Colorimetric Biosensing**

Shenghan Lin<sup>a</sup>, He-Qi Zheng<sup>b,\*</sup>, Guodong Qian<sup>a</sup> and Yuanjing Cui<sup>a,b,\*</sup>

*<sup>a</sup>State Key Laboratory of Silicon and Advanced Semiconductor Materials, School of Materials Science & Engineering, Zhejiang University, Hangzhou 310030, China*

*<sup>b</sup>Zhejiang Provincial Key Laboratory of Optoelectronic Functional Materials and Devices, ZJU-Hangzhou Global Scientific and Technological Innovation Center, Zhejiang University, Hangzhou 311200, China*

E-mail: heqizheng@zju.edu.cn (H.-Q. Zheng); cuiyj@zju.edu.cn (Y. Cui)

## 1. Experimental Section/Methods

### Synthesis of Y-TCPP-2

The Y-TCPP-2 microcrystals were synthesized with the classical solvothermal method<sup>1</sup>. To a 20 mL glass vial containing  $Y(NO_3)_3 \cdot 6H_2O$  (14.8 mg, 0.034 mmol),  $H_4TCPP$  (5.0 mg, 0.009 mmol) and 2-FBA (300 mg, 2.14 mmol) dissolved in DMF (3.0 mL) and acetic acid (1.0 mL). The vial was heated to 120 °C for 48 h. Color-less regular hexagonal prism-shaped crystals were obtained.

### Synthesis of MOF-808FA and MOF-808

MOF-808FA and MOF-808 was synthesized on the basis of recently published articles with slight modifications<sup>2</sup>. Briefly,  $ZrCl_4$  (233 mg, 1.0 mmol), 1,3,5-benzenetricarboxylic acid ( $H_3BTC$ , 70.6 mg, 0.236 mmol), formic acid (5.6 mL, 98 mmol), and  $N,N'$ -dimethylformamide (DMF, 10 mL) were placed in a screw-capped vial and ultrasonically dissolved. The mixture was then placed in an oven at 135 °C for 24 h. After the mixture was cooled naturally to 30 °C in the oven, the white precipitate was filtered and then extracted with methanol overnight via a Soxhlet extractor. Subsequently, the obtained precipitate was dried in a drying oven at 80 °C overnight to obtain MOF-808FA. MOF-808FA (500 mg) was placed in a screw-capped vial. Then, 110 mL of DMF and 10 mL of concentrated HCl were subsequently added. The suspension was then incubated at 80 °C for 24 h. After it was naturally cooled to 30 °C, the solid was collected by suction filtration and then extracted with methanol by a Soxhlet extractor overnight. The resulting white precipitate was dried at 80 °C in a vacuum drying oven to obtain MOF-808.

## **Synthesis of HKUST-1**

The HKUST-1 microcrystals were synthesized with the classical solvothermal method<sup>3</sup>. Cu(NO<sub>3</sub>)<sub>2</sub>·3H<sub>2</sub>O (2.6 g, 10.7 mmol) was dissolved in 30 mL of H<sub>2</sub>O. In a separate flask, H<sub>3</sub>BTC (0.68 g, 3.2 mmol) was dissolved in 30 mL of EtOH. The Cu(NO<sub>3</sub>)<sub>2</sub>·3H<sub>2</sub>O solution was slowly added to the H<sub>3</sub>BTC solution with stirring at room temperature. The solution became turbid, with a precipitate forming. DMF (2 mL) was added to the mixed solution, then the combination was transferred to a 100 mL Teflon-lined autoclave and allowed to be reacted at 80 °C for 20 h. After allowing the autoclave and its contents to cool to room temperature, a crystalline solid was collected and washed with H<sub>2</sub>O and EtOH.

## **Steady-state Kinetic assay of ZJU-132 with H<sub>2</sub>O<sub>2</sub> Substrate .**

The velocity of the reaction was measured at 37 °C using x μL (x = 18, 24, 60, 120, 180, 240, 300) 100 mM H<sub>2</sub>O<sub>2</sub> solution, (300 - x) ethanol, 300 μl of 1.0 mg·mL<sup>-1</sup> ZJU-132 suspension, 2.1 ml of pH 5.0 PBS, and 300 μl of 10 mM OPD and then reacted at 37 °C. During the period, the suspension was taken out at preset time and immediately filtered with a syringe filter. The product was validated by measuring the UV-Vis absorbance at 430 nm and the content of OPDox in the filtrate was assessed through the UV absorbance. The oxidation and peroxidation reaction rates were calculated using the Michaelis-Menten equation.

## **Measurement and analysis.**

Powder X-ray diffraction (PXRD) patterns in the range 2–50° were recorded on an

X'Pert Pro X-ray diffractometer with Cu K $\alpha$  beam ( $\lambda = 1.542 \text{ \AA}$ ) at room temperature. Elemental analyses (EA) of C, H, and N were carried out on an EA1112 microelemental analyzer. The thermogravimetric curves from 30 to 800 °C in N<sub>2</sub> atmosphere were recorded on a Netzsch TGA209F3 thermogravimeter with a heating rate of 5 °C·min<sup>-1</sup>. The photoluminescent (PL) spectra at room temperature were recorded on a Hitachi F4600 fluorescence spectrometer. The Brunauer–Emmett–Teller (BET) specific surface areas and pore size distributions of all the materials were determined by CO<sub>2</sub> adsorption-desorption isotherms at 196 K on Micromeritics 3Flex gas adsorption analyzer. Before the test, the as-synthesized sample (50–100 mg) was first solvent-exchanged with anhydrous ethanol within three days. The solvent-exchanged sample was evacuated at room temperature for 12 h and further at 393 K for other 12 h. The CO<sub>2</sub> adsorption isotherms were measured at 196 K,

### **Single-Crystal X-ray Crystallography.**

The crystallographic measurement and structure determination of **ZJU-132** was performed similarly to our previous literature<sup>4</sup>. The single-crystal X-ray diffraction (SCXRD) collection was taken on a Bruker APEX-II diffractometer, and the structure was determined by direct methods and refined with the SHELX-2014 program package. The hydroxy units of ligands were split into four equivalent parts during structural refinement. Crystallographic data collection and refinement results are summarized in Table S1. **CCDC 2544395** contains the supplementary crystallographic data of **ZJU-132**, which can be obtained from the authors or the Cambridge Crystallographic Data Centre via [www.ccdc.cam.ac.uk/data-request/cif](http://www.ccdc.cam.ac.uk/data-request/cif).

## **General considerations of solution preparation**

MOF suspensions in PBSx1 pH 7.4 (ZJU-132, MOF-808 (Zr), Y-TCPP-2 and HKUST-1 (Cu) were produced at a concentration of 1 mg/mL. The MOF suspensions were kept at room temperature and before use vortexed for 5 minutes. Aqueous solutions of 10 mM H<sub>2</sub>O<sub>2</sub> and different concentrations were prepared by dilutions of purchased H<sub>2</sub>O<sub>2</sub> (30%) in H<sub>2</sub>O.

## 2- Characterization data

**Table S1.** Crystal data, collection and structure refinement result of **ZJU-132**.

| compund                                     | <b>ZJU-132</b>                                                                  |
|---------------------------------------------|---------------------------------------------------------------------------------|
| CCDC                                        | 2544395                                                                         |
| Empirical formula                           | C <sub>128</sub> H <sub>80</sub> Cu <sub>8</sub> N <sub>8</sub> O <sub>40</sub> |
| Formula weight                              | 1431.09                                                                         |
| Temperature/K                               | 241                                                                             |
| Crystal system                              | orthorhombic                                                                    |
| Space group                                 | Imma                                                                            |
| a/Å                                         | 22.202(6)                                                                       |
| b/Å                                         | 29.395(6)                                                                       |
| c/Å                                         | 10.878(3)                                                                       |
| $\alpha$ /°                                 | 90                                                                              |
| $\beta$ /°                                  | 90                                                                              |
| $\gamma$ /°                                 | 90                                                                              |
| Volume/Å <sup>3</sup>                       | 7099(3)                                                                         |
| Z                                           | 8                                                                               |
| $\rho_{\text{calc}}$ /g/cm <sup>3</sup>     | 0.673                                                                           |
| $\mu$ /mm <sup>-1</sup>                     | 0.970                                                                           |
| F(000)                                      | 1456.0                                                                          |
| Crystal size/mm <sup>3</sup>                | 0.06 × 0.1 × 0.12                                                               |
| Radiation                                   | CuK $\alpha$ ( $\lambda$ =1.54178 Å)                                            |
| 2 $\Theta$ range for data collection/°      | 3.982 to 68.492                                                                 |
| Index ranges                                | -26 ≤ h ≤ 26, -35 ≤ k ≤ 32, -13 ≤ l ≤ 13                                        |
| Reflections collected                       | 39348                                                                           |
| Independent reflections                     | 3425 [R <sub>int</sub> = 0.0718, R <sub>sigma</sub> = 0.0811]                   |
| Data/restraints/parameters                  | 3425/126 /178                                                                   |
| Goodness-of-fit on F <sup>2</sup>           | 1.085                                                                           |
| Final R indexes [I ≥ 2 $\sigma$ (I)]        | R <sub>1</sub> = 0.0762, wR <sub>2</sub> = 0.2235                               |
| Final R indexes [all data]                  | R <sub>1</sub> = 0.0890, wR <sub>2</sub> = 0.2556                               |
| Largest diff. peak/hole / e Å <sup>-3</sup> | 1.189/-0.902                                                                    |

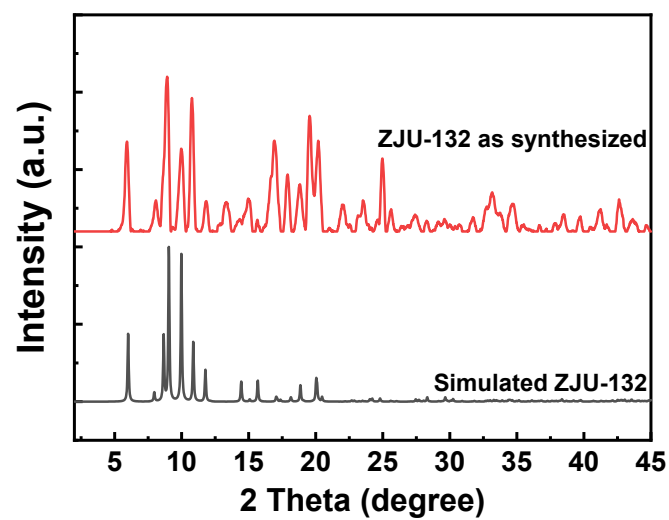

**Figure S1.** PXRD patterns of synthesized ZJU-132.

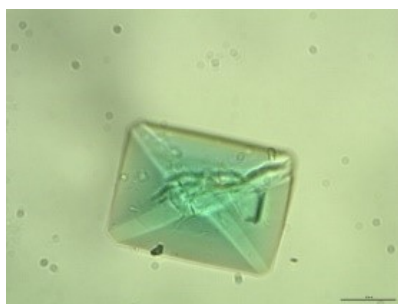

**Figure S2.** Optical images of the as-synthesized ZJU-132. Scale bar: 50  $\mu\text{m}$ .

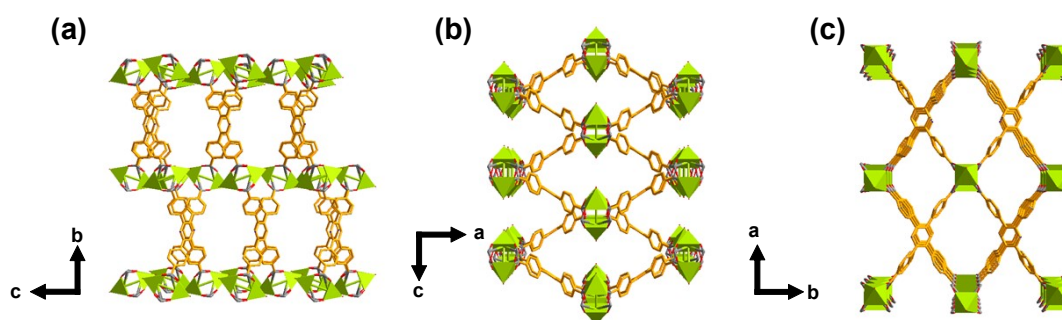

**Figure S3.** (a-c) The structure of ZJU-132 seen from the  $a$ -axis (a),  $b$ -axis (b) and  $c$ -axis (c).

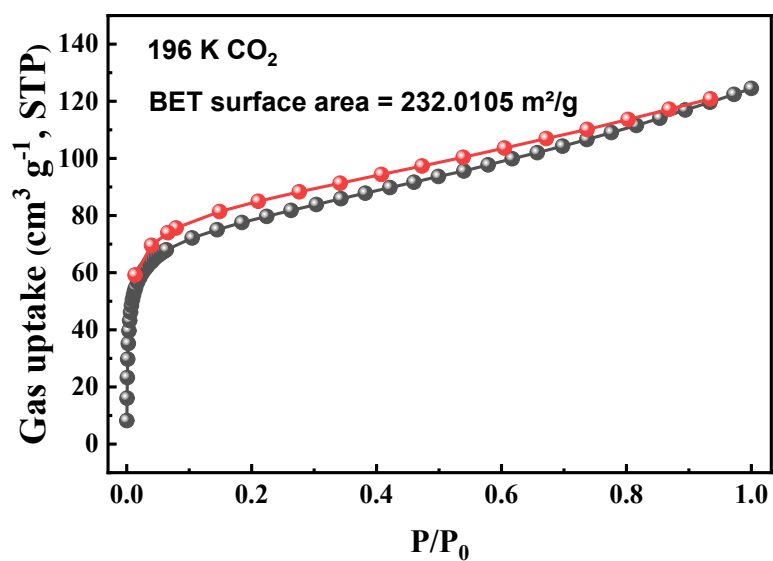

Figure S4. CO<sub>2</sub> sorption isotherms of ZJU-132 at 196 K

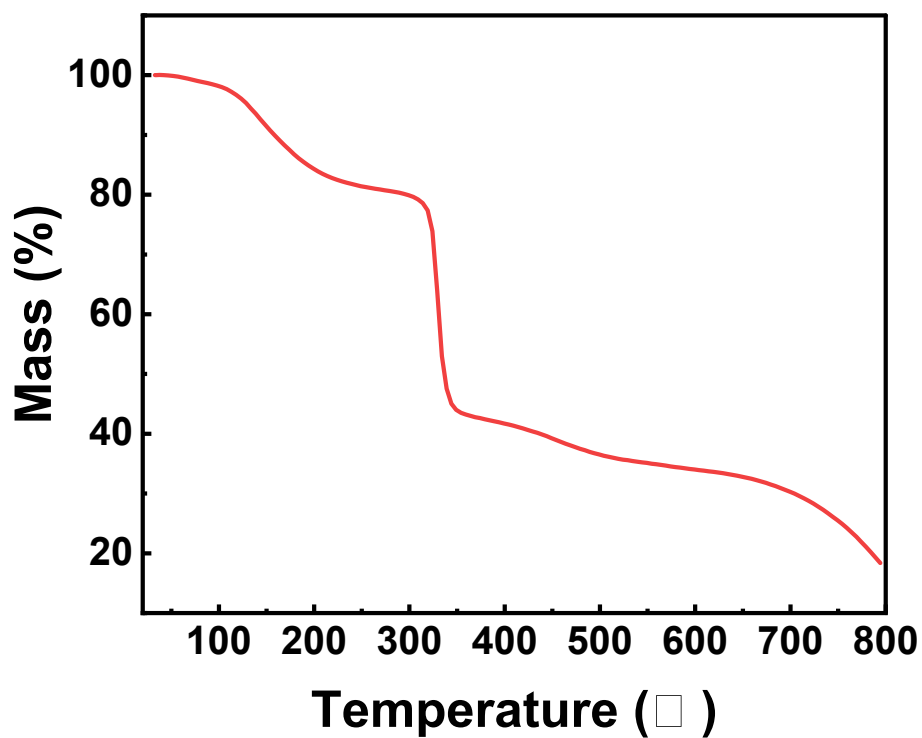

Figure S5. TGA curves for ZJU-132 under nitrogen.

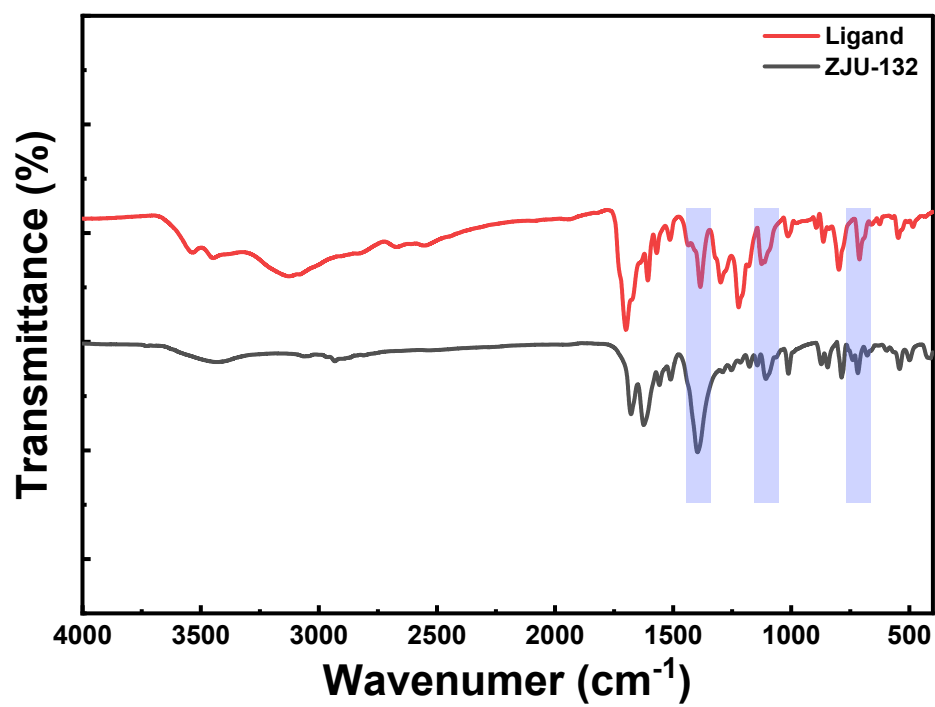

Figure S6. FTIR spectrums for ZJU-132 and Ligand.

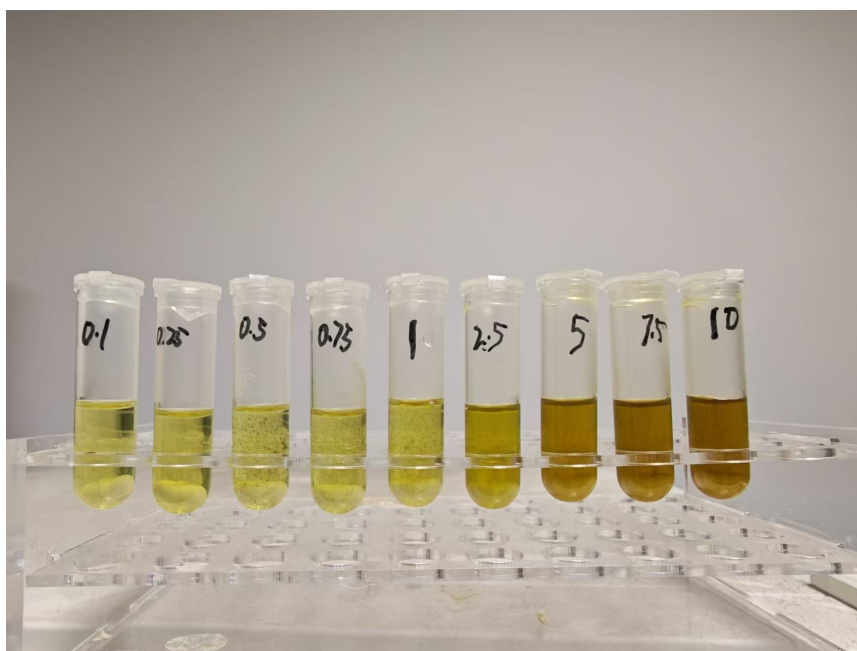

**Figure S7.** optical photographs of the OPD oxidation reaction system catalyzed by ZJU-132 under a series of H<sub>2</sub>O<sub>2</sub> concentrations (0.1 mM-10 mM).

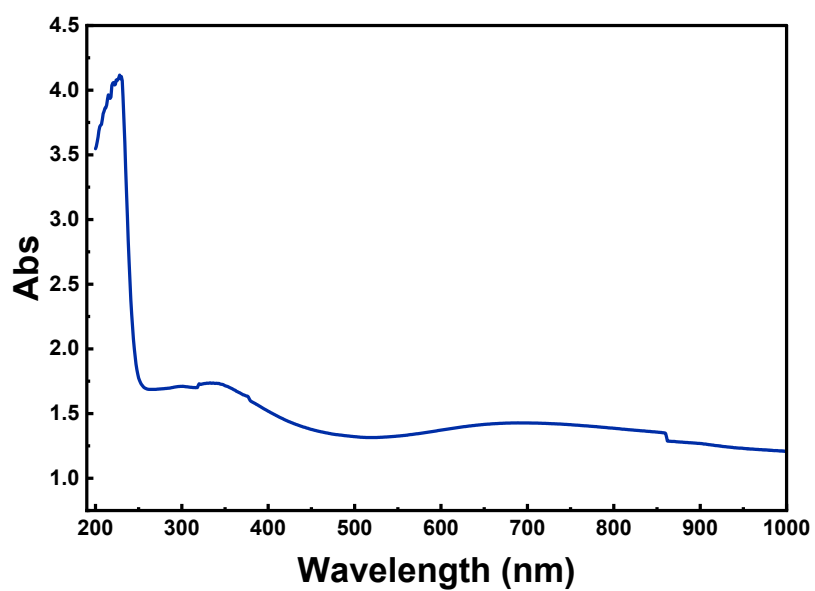

**Figure S8.** The solid-state UV-vis absorption spectrum of the ZJU-132 powder sample.

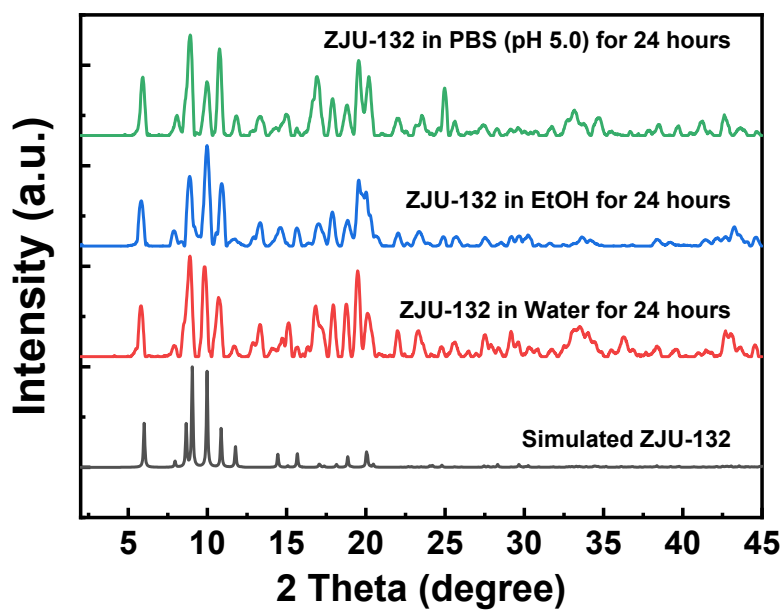

**Figure S9.** The stability of ZJU-132 under different environments.

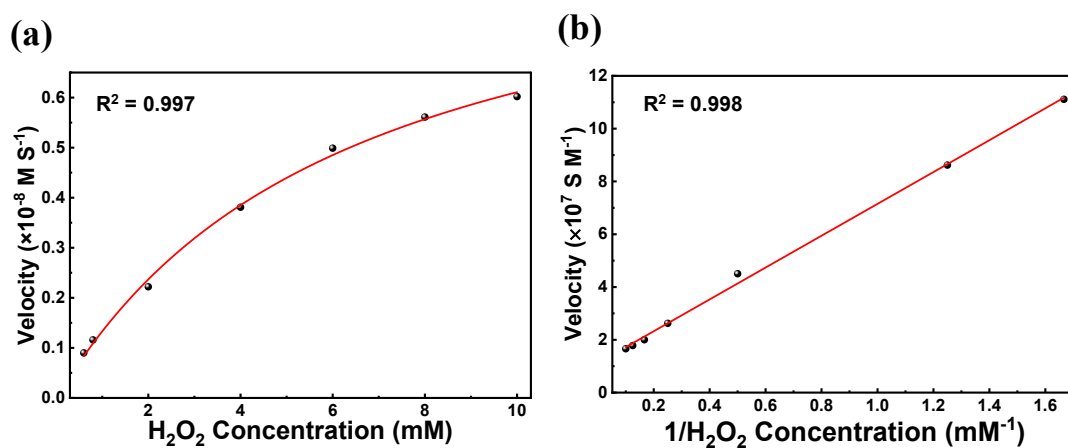

**Figure S10.** Results of nonlinear fitting of Michaelis-Menten curves for H<sub>2</sub>O<sub>2</sub> by ZJU-

132.

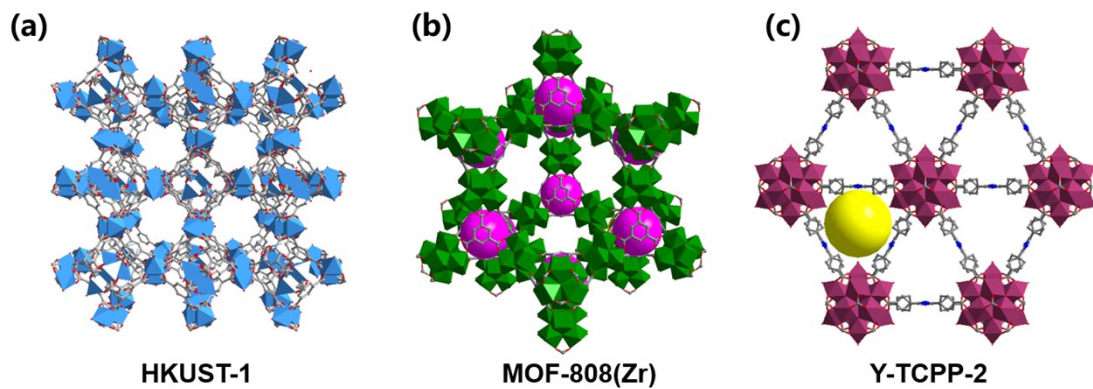

Figure S11. Crystal structure of (a) HKUST-1(Cu), (b) MOF-808(Zr), (c) Y-TCPP-2.

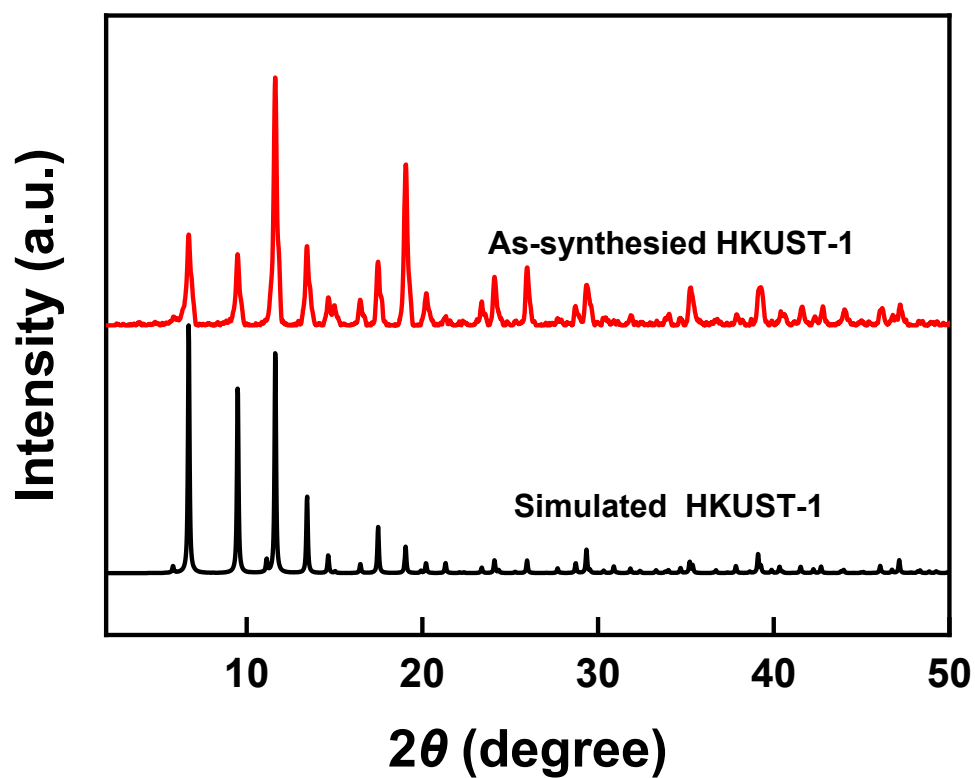

Figure S12. PXRD patterns of synthesized HKUST-1.

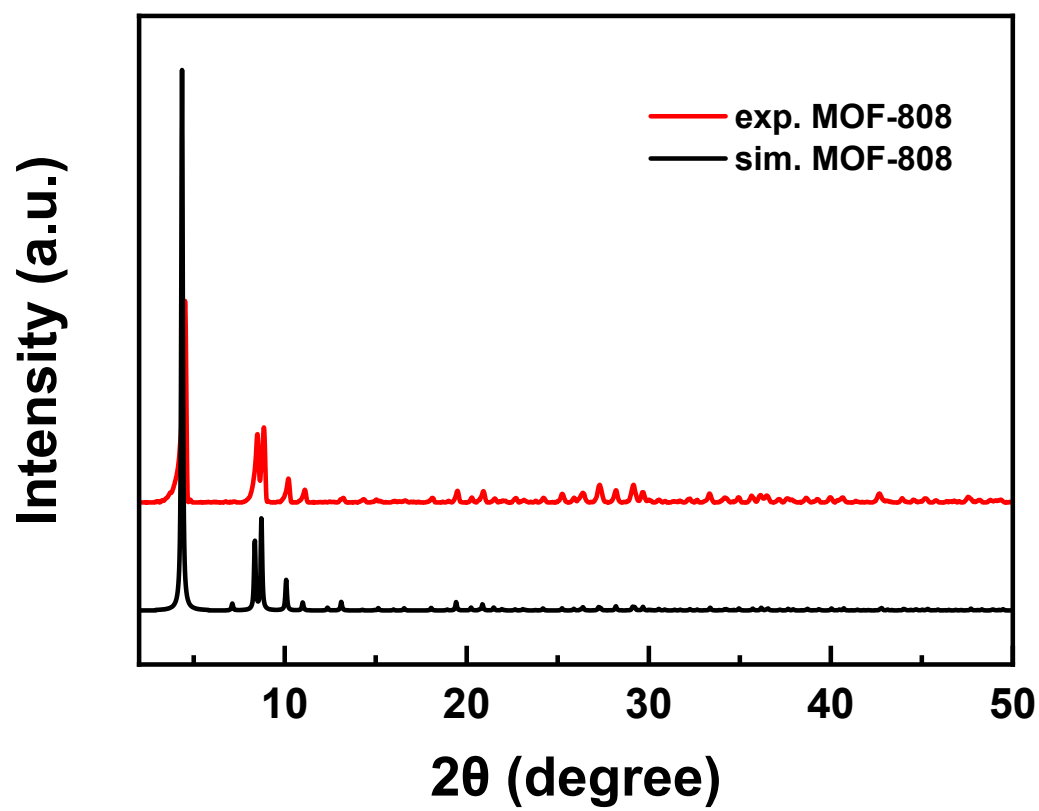

**Figure S13.** PXRD patterns of synthesized MOF-808(Zr).

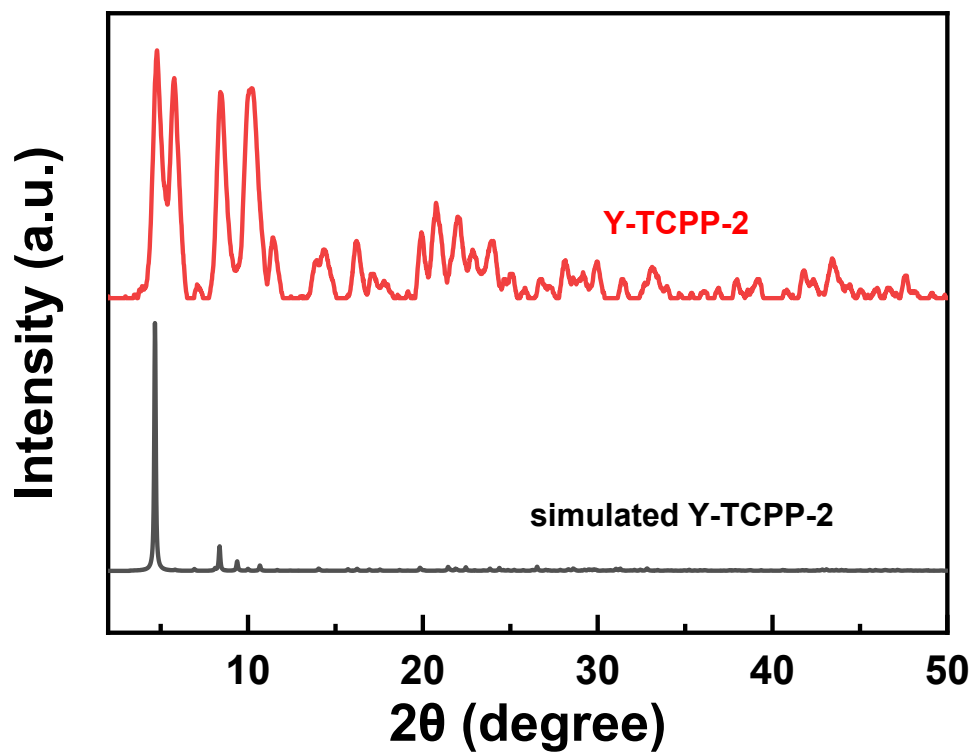

Figure S14. PXRD patterns of synthesized Y-TCPP-2.

## References

1. H.-Q. Zheng, L. Zhang, M. Lu, X. Xiao, Y. Yang, Y. Cui and G. Qian, *Research*, 2022, **2022**.
2. H. Furukawa, F. Gándara, Y.-B. Zhang, J. Jiang, W. L. Queen, M. R. Hudson and O. M. Yaghi, *J. Am. Chem. Soc.*, 2014, **136**, 4369-4381.
3. N. C. Jeong, B. Samanta, C. Y. Lee, O. K. Farha and J. T. Hupp, *J. Am. Chem. Soc.*, 2012, **134**, 51-54.
4. L. Zhang, H. Li, H. He, Y. Yang, Y. Cui and G. Qian, *Small*, 2021, **17**, 2006649.
